# Supplementary material for: Adenovirus Vectors Expressing Eight Multiplex Guide RNAs of CRISPR/Cas9 Efficiently Disrupted Diverse Hepatitis B Virus Gene Derived from Heterogeneous Patient
Source: MDPI journal article supplement (doi:10.3390/ijms221910570), 2021-09-29
Supplement: s1 [file s1]

# Supplementary Table S1

## Sequences of target gRNAs in HBV DR1 region and X gene

| gRNA  | oligo name | sequence             |
|-------|------------|----------------------|
| cut-1 | HBc 69b1   | GAAGCGAAGTGCACACGGTC |
| cut-2 | HBc 70b2   | GAGGTGAAGCGAAGTGCACA |
| cut-3 | HBc 71b3   | GGTTTCCATGCGACGTGCAG |
| cut-4 | HBc 72b4   | GACCTGGTGGGCGTTCACGG |
| cut-5 | HBc 73t1   | GTCTTATATAAGAGGACTCT |
| cut-6 | HBc 74b2   | GACCTTGGGCAAGACCTGGT |
| cut-7 | HBc 75b3   | GTCCTCTTATATAAGACCTT |
| cut-8 | HBc 76t4   | GATGTCAACGACCGACCTTG |
| cut-9 | HBc 80b1   | GCAGAGGTGAAAAAGTTGCA |

In addition to the cut numbers in Figure 2a, the original name of oligos and their sequences are shown. The sequences are the same as those in Supplementary Figure S3 in Nakanishi T *et al.*, J Gene Med, 21: e3115, 2019, on the sequences of the HBV X gene.

# Supplementary Figure S1

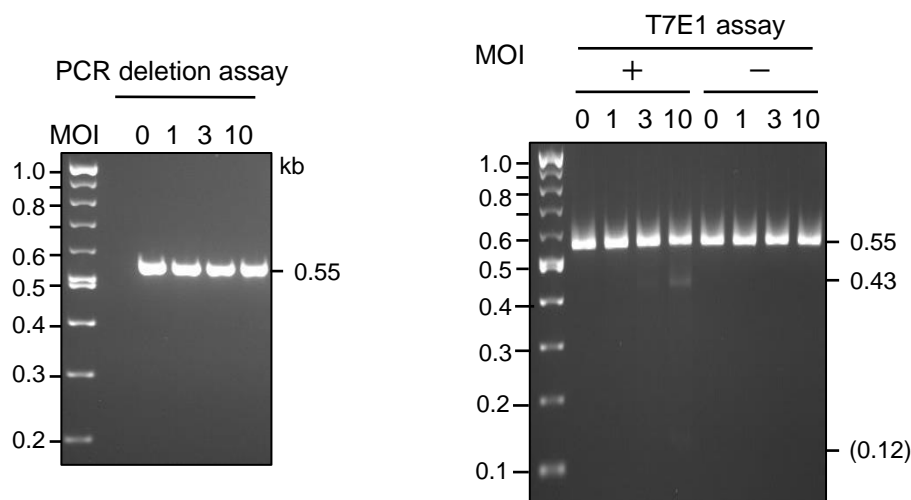

**Confirmation of the difference between PCR deletion assay and T7E1 assay.** It was expected that a single cleavage would not be detected by the PCR deletion assay, but would be detected by the T7E1 assay. To confirm this, Gx11 cells were coinfectd with Axx4HBV-DR1 and AxxCBCas9 at the indicated MOIs. This Adv expresses the one gRNA (cut 9) that targets the HBV X gene. Three days later, total cellular DNA was prepared and both assays were performed. No band was detected using the PCR deletion assay (left panel) and the expected 0.43-kb band was observed at MOI 10 using the T7E1 assay (right panel).
